# Supplementary material
Source: PubMed Central journal article supplement (PMC2669969)
Supplement: tjp0587-0753-SD1.pdf [file tjp0587-0753-SD1.pdf]

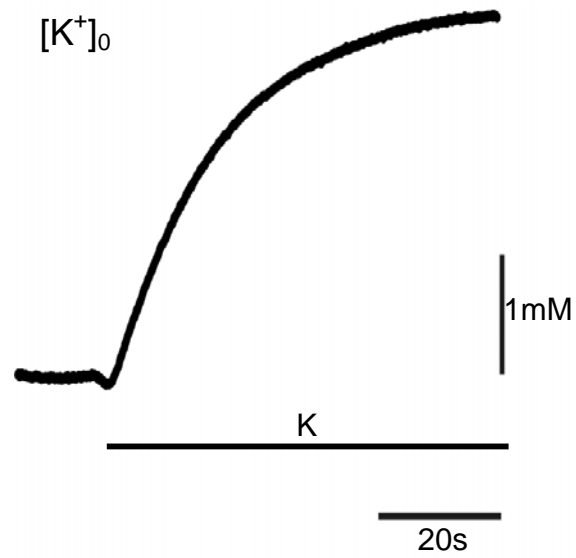

**Supplementary Figure 1. Kinetics of perfusate exchange in perfusion chamber.**  $[K^+]_0$  was measured using  $K^+$  sensitive microelectrode during an increase of  $[K^+]_0$  from 3 mM by 2 – 3 mM via bath perfusion. The resulting trace was fitting into a mono-exponential curve from which the time constant of  $K^+$  accumulation was determined. The speed of perfusion was 4.2 ml/min; volume in chamber was 2.1 ml and the flow was turbulent.

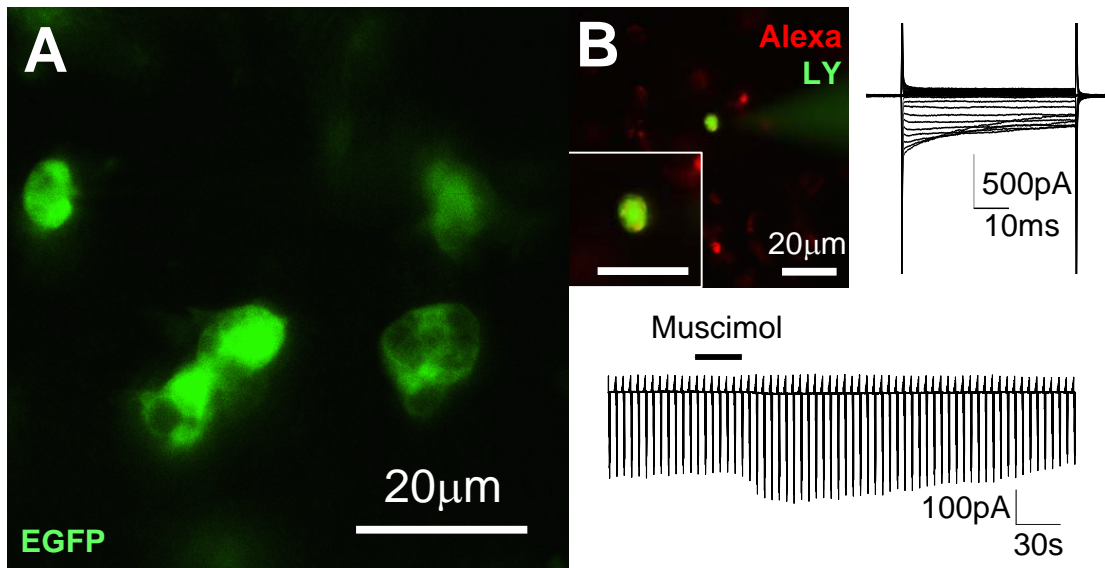

**Supplementary Figure 2. Ameboid microglial population and response towards muscimol.** (A) Image of EGFP fluorescence of ameboid microglia on the surface of the corpus callosum in an acute brain slice prepared from postnatal (P6 - 8) Iba1-EGFP transgenic mouse. (B) Ameboid microglia within the corpus callosum brain slice prepared from NMRI mice (P6 - 8) could be identified after incubation of the slices for 40 min with fluorescently (Alexa Fluor 594) labelled tomato lectin (60  $\mu\text{g/ml}$ ), a marker for microglial cells. The cell was filled with Lucifer yellow (2 mg/ml) via patch pipette. Inset shows ameboid morphology of the patched cell in higher resolution. Membrane current was recorded as described in *Fig. 1*. Bath application of muscimol (100  $\mu\text{M}$ ; 30 s) induced current changes as shown.

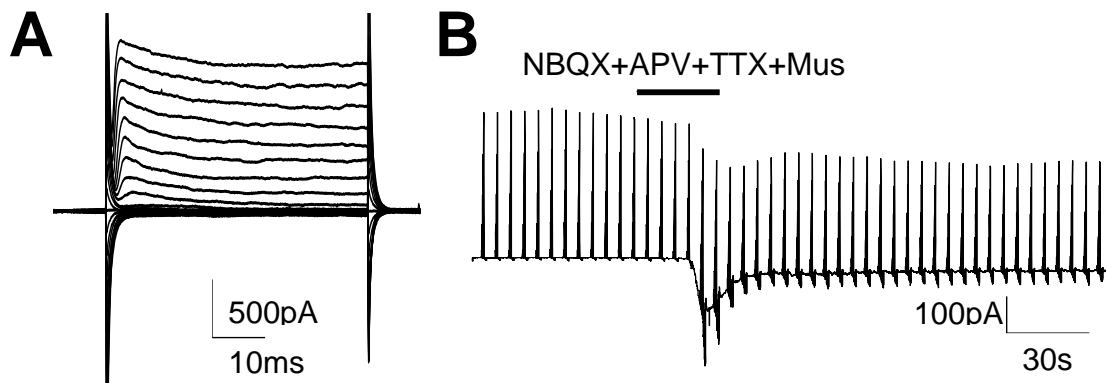

**Supplementary Figure 3. Specific GABA<sub>A</sub> mediated current response in neighboring glial progenitor cells of the postnatal corpus callosum.** Using the same approach of *Fig. 6B*, a glial progenitor cell in the neighbourhood of amoeboid microglia in the postnatal corpus callosum was voltage-clamped. (A) Membrane currents revealed voltage-gated currents were recorded as described in *Fig. 1B*. (B) Membrane current was recorded as described in *Fig. 1C* during application of muscimol (100  $\mu$ M; 30 s) in the presence of AMPA/kainate receptor antagonist NBQX (10  $\mu$ M), NMDA receptor antagonist APV (50  $\mu$ M) and an action potential blocker TTX (0.5  $\mu$ M). AMPA = alpha-amino-3-hydroxy-5-methyl-4-isoxazolepropionic acid; NBQX = 2,3-dihydroxy-6-nitro-7-sulfamoyl-benzo[f]quinoxaline-2,3-dione; NMDA = N-methyl-D-aspartic acid; APV = amino-5-phosphonovaleric acid; TTX = tetrodotoxin.
